# Supplementary material for: Fast-cycling unit of root turnover in perennial herbaceous plants in a cold temperate ecosystem
Source: PubMed Central journal article supplement (PMC4726329; doi:10.1038/srep19698), 2016-01-21

1 **Fast-cycling unit of root turnover in perennial herbaceous**  
 2 **plants in a cold temperate ecosystem**

3

4 Kai Sun<sup>1</sup>, M. Luke McCormack<sup>2</sup>, Le Li<sup>2, 3</sup>, Zeqing Ma<sup>2</sup>, Dali Guo<sup>2\*</sup>

5

6 **Supplementary information**

7 **Table S1** Accuracy of visual assessment the status of roots (i.e. alive or dead) from

8 different branching levels (P: basal, S: secondary, T: tertiary, Q: quaternary) in seven

9 perennial understory species. Number of alive/dead roots by visual assessment

10 means the number of alive/dead roots determined based on color and textual cues.

11 Number of alive/dead roots by TTC staining is the number of alive/dead roots

12 determined by 2, 3, 5-triphenyl tetrazolium chloride vital staining results.

| Species             | Root | Status | Number of<br>alive/dead<br>roots by visual<br>assessment | Number of<br>alive/dead<br>roots by TTC<br>staining | Accuracy |
|---------------------|------|--------|----------------------------------------------------------|-----------------------------------------------------|----------|
| <i>A. pilosa</i>    | B    | Alive  | 64                                                       | 55                                                  | 0.86     |
|                     |      | Dead   | 29                                                       | 29                                                  | 1.00     |
|                     | S    | Alive  | 51                                                       | 44                                                  | 0.86     |
|                     |      | Dead   | 22                                                       | 22                                                  | 1.00     |
|                     | T    | Alive  | 44                                                       | 44                                                  | 1.00     |
|                     |      | Dead   | 24                                                       | 21                                                  | 0.88     |
|                     | Q    | Alive  | 42                                                       | 39                                                  | 0.93     |
|                     |      | Dead   | 25                                                       | 23                                                  | 0.92     |
| <i>G. aleppicum</i> | B    | Alive  | 36                                                       | 31                                                  | 0.86     |
|                     |      | Dead   | 15                                                       | 15                                                  | 1.00     |
|                     | S    | Alive  | 33                                                       | 26                                                  | 0.79     |
|                     |      | Dead   | 22                                                       | 22                                                  | 1.00     |

|                       |                              |       |       |    |      |      |
|-----------------------|------------------------------|-------|-------|----|------|------|
| <i>R. hondai</i>      | T                            | Alive | 39    | 38 | 0.97 |      |
|                       |                              | Dead  | 13    | 13 | 1.00 |      |
|                       | Q                            | Alive | 92    | 90 | 0.98 |      |
|                       |                              | Dead  | 50    | 49 | 0.98 |      |
|                       | B                            | Alive | 50    | 42 | 0.84 |      |
|                       |                              | Dead  | 25    | 25 | 1.00 |      |
|                       | S                            | Alive | 40    | 31 | 0.78 |      |
|                       |                              | Dead  | 20    | 20 | 1.00 |      |
|                       | T                            | Alive | 40    | 29 | 0.73 |      |
|                       |                              | Dead  | 20    | 20 | 1.00 |      |
|                       | Q                            | Alive | 80    | 57 | 0.71 |      |
|                       |                              | Dead  | 40    | 40 | 1.00 |      |
| <i>R. saxatilis</i>   | B                            | Alive | 50    | 41 | 0.82 |      |
|                       |                              | Dead  | 25    | 25 | 1.00 |      |
|                       | S                            | Alive | 40    | 37 | 0.93 |      |
|                       |                              | Dead  | 20    | 20 | 1.00 |      |
|                       | T                            | Alive | 40    | 38 | 0.95 |      |
|                       |                              | Dead  | 20    | 20 | 1.00 |      |
|                       | Q                            | Alive | 80    | 79 | 0.99 |      |
|                       |                              | Dead  | 40    | 36 | 0.90 |      |
|                       | <i>T. kirilowii</i>          | B     | Alive | 50 | 45   | 0.90 |
|                       |                              |       | Dead  | 25 | 25   | 1.00 |
|                       |                              | S     | Alive | 40 | 37   | 0.93 |
|                       |                              |       | Dead  | 20 | 20   | 1.00 |
| T                     |                              | Alive | 40    | 39 | 0.98 |      |
|                       |                              | Dead  | 20    | 20 | 1.00 |      |
| Q                     |                              | Alive | 80    | 75 | 0.94 |      |
|                       |                              | Dead  | 40    | 40 | 1.00 |      |
| <i>T. petaloideum</i> |                              | B     | Alive | 54 | 39   | 0.72 |
|                       |                              |       | Dead  | 27 | 27   | 1.00 |
|                       |                              | S     | Alive | 42 | 29   | 0.69 |
|                       |                              |       | Dead  | 21 | 21   | 1.00 |
|                       | T                            | Alive | 52    | 44 | 0.85 |      |
|                       |                              | Dead  | 26    | 24 | 0.92 |      |
|                       | Q                            | Alive | 52    | 43 | 0.83 |      |
|                       |                              | Dead  | 26    | 21 | 0.81 |      |
|                       | <u><i>V. officinalis</i></u> | B     | Alive | 50 | 35   | 0.70 |

|   |       |    |    |      |
|---|-------|----|----|------|
|   | Dead  | 25 | 25 | 1.00 |
| S | Alive | 40 | 33 | 0.83 |
|   | Dead  | 20 | 20 | 1.00 |
| T | Alive | 40 | 30 | 0.75 |
|   | Dead  | 20 | 20 | 1.00 |
| Q | Alive | 80 | 59 | 0.74 |
|   | Dead  | 40 | 40 | 1.00 |

---

1

1 **Table S2** Regressions relating root morphology and chemical traits to lifespan.

| Root trait             | Slope | <i>P</i> | <i>R</i> <sup>2</sup> |
|------------------------|-------|----------|-----------------------|
| Root diameter          | +     | 0.004    | 0.28                  |
| Root length            | +     | <0.001   | 0.48                  |
| N: C Ratio             | -     | 0.019    | 0.19                  |
| Tissue density         | +     | <0.001   | 0.37                  |
| Log(SRL)               | -     | <0.001   | 0.36                  |
| Individual root mass   | +     | 0.005    | 0.26                  |
| Log(Total root number) | -     | 0.008    | 0.24                  |

2

- 1 **Table S3** Characteristics of herbaceous species studied in other literature that may
- 2 have similar fast-cycling units with species we studied.

| Location                | Ecosystem                                | Species                         | Growth habit | Root system type | Method          | Turnover estimate | Reference                |                                 |
|-------------------------|------------------------------------------|---------------------------------|--------------|------------------|-----------------|-------------------|--------------------------|---------------------------------|
| Alaska, USA             | Tundra                                   | <i>Eriophorum angustifolium</i> | Graminoid    | Fibrous          | Root box        | Annual (<1 yr)    | Shaver and Billings 1975 |                                 |
| Craibstone Estate, UK   | <i>Prunus avium</i> garden               | <i>Lolium perenne</i>           | Graminoid    | Fibrous          | Minirhizontron  | 0.12 yr           | Watson et al. 2000       |                                 |
| Craibstone Estate, UK   | <i>Prunus avium</i> garden               | <i>Trifolium repens</i>         | Graminoid    | Fibrous          | Minirhizontron  | 0.11 yr           |                          |                                 |
| Apennine Mountains, ITA | Acer pseudoplatanus garden               | <i>Lolium perenne</i>           | Graminoid    | Fibrous          | Minirhizontron  | 0.04 yr           | Pärtel and Wilson 2001   |                                 |
|                         |                                          | <i>Trifolium repens</i>         | Graminoid    | Fibrous          | Minirhizontron  | 0.03 yr           |                          |                                 |
| Regina, CAN             | Monoculture (common circumpolar species) | <i>Festuca rubra</i>            | Graminoid    | Fibrous          | Minirhizontron  | 0.13 yr           |                          |                                 |
| Colorado, USA           | Steppe                                   | <i>Bouteloua gracilis</i>       | Graminoid    | Fibrous          | Minirhizontron  | 0.9 yr            |                          | Gill et al. 2002                |
|                         |                                          | <i>Bouteloua gracilis</i>       | Graminoid    | Fibrous          | Minirhizontron  | 0.5 yr            |                          |                                 |
|                         |                                          | <i>Lolium perenne</i>           | Graminoid    | Fibrous          | Minirhizontron  | 0.3 yr            |                          |                                 |
| Wageningen, NL          | Monoculture                              | <i>Arrhenatherum elatius</i>    | Graminoid    | Fibrous          | Minirhizontron  | 0.8 yr            |                          | Van der Krift and Berendse 2002 |
|                         |                                          | <i>Nardus stricta</i>           | Graminoid    | Fibrous          | Minirhizontron  | 1.0 yr            |                          |                                 |
|                         |                                          | <i>Molinia caerulea</i>         | Graminoid    | Fibrous          | Minirhizontron  | 1.1 yr            |                          |                                 |
| Waarde, NL              | Salt marsh                               | <i>Elymus pycnanthus</i>        | Graminoid    | Fibrous          | In-growth cores | 0.3 yr            | Bouma et al. 2003        |                                 |
|                         |                                          | <i>Spartina anglica</i>         | Graminoid    | Fibrous          | In-growth cores | 1.0 yr            |                          |                                 |
| South Carolina, USA     | Oak forest                               | <i>Aristida stricta</i>         | Graminoid    | Fibrous          | Rhizotrons      | 2.1 yr            | West et al. 2003         |                                 |
|                         |                                          | <i>Schizachyrium scoparium</i>  | Graminoid    | Fibrous          | Rhizotrons      | 1.0 yr            |                          |                                 |
| Utah, USA               | Sagebrush-dominated                      | <i>Agropyron desertorum</i>     | Graminoid    | Fibrous          | Minirhizontron  | 0.15 yr           | Peek et al. 2005         |                                 |

| arid ecosystem            |                                                                                        |                                |               |         |                                     |           |                      |
|---------------------------|----------------------------------------------------------------------------------------|--------------------------------|---------------|---------|-------------------------------------|-----------|----------------------|
| Minnesota, USA            | Oak savannah, prairie, hardwood forest, pine forests and abandoned agricultural fields | <i>Agropyron repens</i>        | Graminoid     | Fibrous |                                     | 0.14 yr   | Tjoelker et al. 2005 |
|                           |                                                                                        | <i>Koeleria cristata</i>       | Graminoid     | Fibrous |                                     | 0.26 yr   |                      |
|                           |                                                                                        | <i>Poa pratensis</i>           | Graminoid     | Fibrous |                                     | 0.25 yr   |                      |
|                           |                                                                                        | <i>Andropogon gerardii</i>     | Graminoid     | Fibrous | In-growth and in situ root sampling | 0.2 yr    |                      |
|                           |                                                                                        | <i>Schizachyrium scoparium</i> | Graminoid     | Fibrous |                                     | 0.2 yr    |                      |
|                           |                                                                                        | <i>Sorghastrum nutans</i>      | Graminoid     | Fibrous |                                     | 0.16 yr   |                      |
|                           |                                                                                        | <i>Anemone cylindrica</i>      | Forb          | Fibrous |                                     | 0.18 yr   |                      |
|                           |                                                                                        | <i>Asclepias syriaca</i>       | Forb          | Fibrous |                                     | 0.12 yr   |                      |
| <i>Rudbeckia serotina</i> | Forb                                                                                   | Fibrous                        |               | 0.13 yr |                                     |           |                      |
| California, USA           | Desert                                                                                 | <i>Agave deserti</i>           | Forb/subshrub | Fibrous | Root chamber                        | < 0.25 yr | Nobel et al. 1992    |

1

2

1 **Table S4 Glossary**

2 **Basal roots:**

3 Roots that directly attached to the base of stem (rhizome or stolon), or the most  
4 proximal roots among all levels of root branching.

5 **Rhizome:**

6 An underground stem with nodes, can produce both roots shoots.

7 **Root collar:**

8 Specialized swollen area near stem apex in terrestrial plants.

9



1

2 **Table S5**

| Species (abbreviation)             | Branch level | Mean time (d) | Number observed | Number censored <sup>3</sup> |
|------------------------------------|--------------|---------------|-----------------|------------------------------|
| <i>Agrimonia pilosa</i> (AP)       | B            | 393           | 101             | 35                           |
|                                    | S            | 104           | 24              | 1                            |
|                                    | T            | 82            | 175             | 0                            |
|                                    | O            | 69            | 1079            | 0                            |
| <i>Geum aleppicum</i> (GA)         | B            | 675           | 95              | 72                           |
|                                    | S            | 394           | 301             | 60                           |
|                                    | T            | 377           | 87              | 12                           |
|                                    | O            | 236           | 1217            | 7                            |
| <i>Roegneria hondai</i> (RH)       | B            | 359           | 56              | 20                           |
|                                    | S            | 300           | 21              | 5                            |
|                                    | T            | 198           | 87              | 14                           |
|                                    | O            | 142           | 804             | 78                           |
| <i>Rubus saxatilis</i> (RS)        | B            | 693           | 23              | 13                           |
|                                    | S            | 555           | 14              | 6                            |
|                                    | T            | 448           | 24              | 9                            |
|                                    | O            | 346           | 164             | 13                           |
| <i>Tephroses kirilowii</i> (TK)    | B            | 624           | 96              | 66                           |
|                                    | S            | 307           | 33              | 7                            |
|                                    | T            | 318           | 113             | 26                           |
|                                    | O            | 265           | 572             | 62                           |
| <i>Thalictrum petaloideum</i> (TP) | B            | 205           | 48              | 0                            |
|                                    | S            | 62            | 17              | 0                            |
|                                    | T            | 53            | 24              | 0                            |
|                                    | O            | 44            | 303             | 0                            |
| <i>Valeriana officinalis</i> (VO)  | B            | 353           | 99              | 0                            |
|                                    | S            | 119           | 110             | 0                            |
|                                    | T            | 154           | 46              | 0                            |
|                                    | Q            | 93            | 578             | 0                            |

- 1 **Figure S1** Example of rhizotrons we installed *in situ*. Panel A: the root window
- 2 was under a plant with known identity. Panel B: a close-up view of a root window
- 3 with roots grew in.

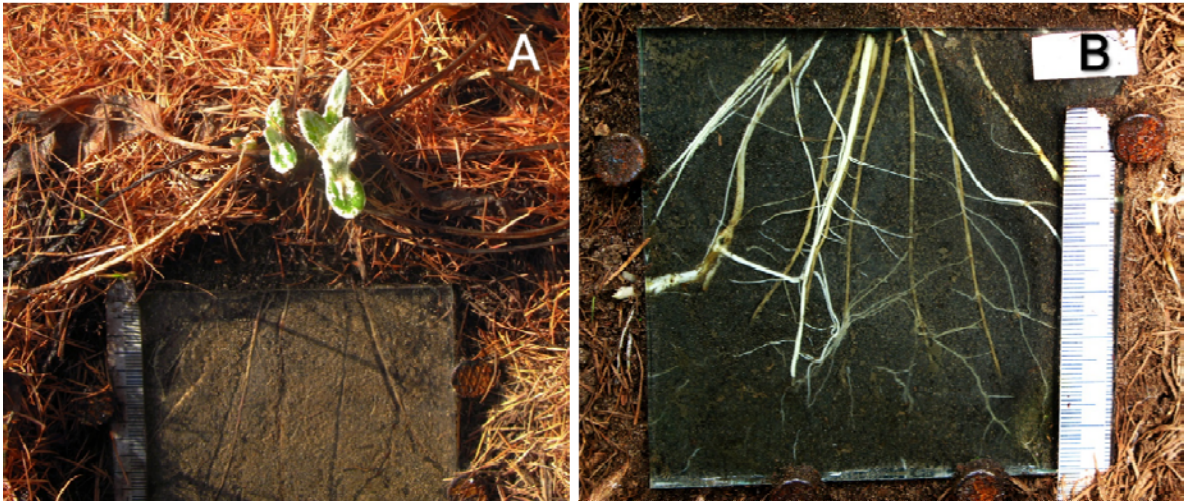

1 **Figure S2** Root survivorship of seven temperate perennial understory species  
 2 during the study period.

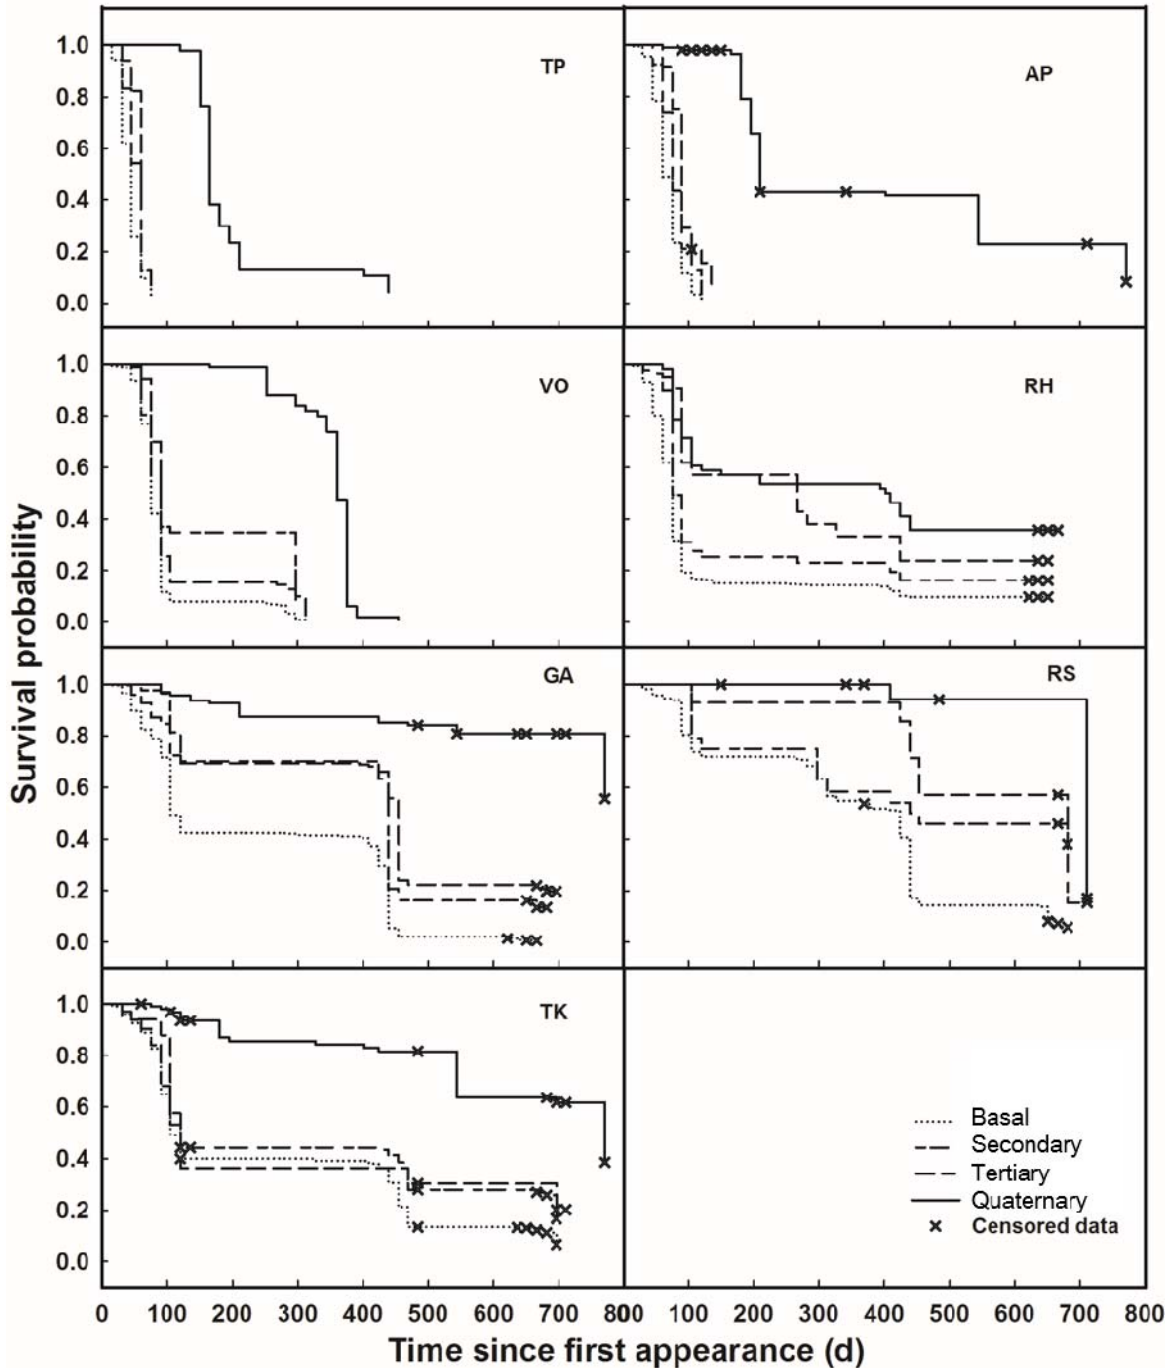

Supplement: srep19698-s1.pdf [file srep19698-s1.pdf]
